# Supplementary material
Source: publisher figshare collection journal article supplement (https://sage.figshare.com/ndownloader/files/20066264)
Supplement: Supplementary file 1 [file 20066264]

|                                                                                                                                                                                                                                                                                                                                                                                                                          |                                                                                                                                                                                                                                                                                                                                                                                                                                                                                                                                    |
|--------------------------------------------------------------------------------------------------------------------------------------------------------------------------------------------------------------------------------------------------------------------------------------------------------------------------------------------------------------------------------------------------------------------------|------------------------------------------------------------------------------------------------------------------------------------------------------------------------------------------------------------------------------------------------------------------------------------------------------------------------------------------------------------------------------------------------------------------------------------------------------------------------------------------------------------------------------------|
| <b>What is your age?</b> _____ years<br><br><b>Sex (male/female):</b> <input type="checkbox"/> Male <input type="checkbox"/> Female                                                                                                                                                                                                                                                                                      | <b>Number of years of education you have achieved? (12 for high school, 16 for undergraduate degree, for example)</b><br><br>_____ years                                                                                                                                                                                                                                                                                                                                                                                           |
| <b>What is your race/ethnicity? Please check <u>all</u> that apply</b><br><input type="checkbox"/> White/ Non-Hispanic<br><input type="checkbox"/> Black or African American<br><input type="checkbox"/> American Indian or Alaska Native<br><input type="checkbox"/> Asian<br><input type="checkbox"/> Hispanic<br><input type="checkbox"/> Native Hawaiian or other Pacific Islander<br><input type="checkbox"/> Other | <b>What type of insurance do you have? Please check <u>all</u> that apply</b><br><input type="checkbox"/> Medicaid/Medi-Cal<br><input type="checkbox"/> Medicare<br><input type="checkbox"/> Health insurance from my employer/ my spouse's employer<br><input type="checkbox"/> Health insurance that I purchase personally out of pocket<br><input type="checkbox"/> Supplemental insurance that I and/or my spouse pays<br><input type="checkbox"/> No health insurance<br><input type="checkbox"/> Other: Please specify _____ |
| <b>What is your employment status?</b> <input type="checkbox"/> Working <input type="checkbox"/> Retired <input type="checkbox"/> Disabled <input type="checkbox"/> Unemployed                                                                                                                                                                                                                                           |                                                                                                                                                                                                                                                                                                                                                                                                                                                                                                                                    |

Directions: Circle or check the responses that are **most appropriate** for your situation.

1. What do you feel is the **level** of your **financial stress today**?

|                     |   |   |             |   |            |   |   |                  |    |  |
|---------------------|---|---|-------------|---|------------|---|---|------------------|----|--|
| 1                   | 2 | 3 | 4           | 5 | 6          | 7 | 8 | 9                | 10 |  |
| Overwhelming Stress |   |   | High Stress |   | Low Stress |   |   | No Stress at All |    |  |

2. On the stair steps below, mark (with a circle) how **satisfied** you are with your **present financial situation**. The "1" at the bottom of the steps represents complete dissatisfaction. The "10" at the top of the stairs represents complete satisfaction. The more dissatisfied you are, the lower number you should circle. The more satisfied you are, the higher number you should circle.

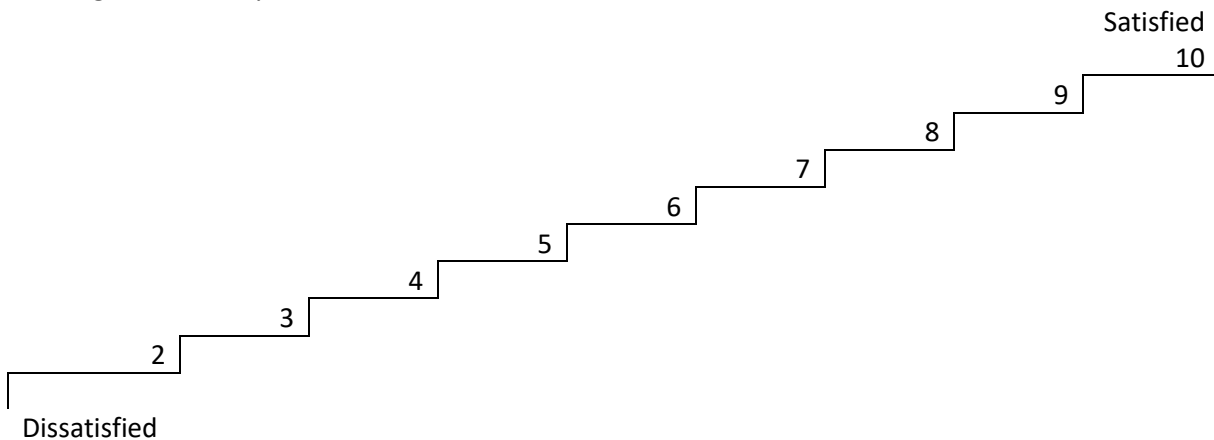

3. How do you feel about your **current financial situation**?

|                  |   |   |                        |   |             |   |   |                  |    |  |
|------------------|---|---|------------------------|---|-------------|---|---|------------------|----|--|
| 1                | 2 | 3 | 4                      | 5 | 6           | 7 | 8 | 9                | 10 |  |
| Feel Overwhelmed |   |   | Sometimes Feel Worried |   | Not Worried |   |   | Feel Comfortable |    |  |

4. How often do you worry about being **able to meet** normal monthly living expenses?

|                  |   |   |                   |   |             |   |   |                  |    |  |
|------------------|---|---|-------------------|---|-------------|---|---|------------------|----|--|
| 1                | 2 | 3 | 4                 | 5 | 6           | 7 | 8 | 9                | 10 |  |
| Feel Overwhelmed |   |   | Sometimes Worried |   | Not Worried |   |   | Feel Comfortable |    |  |

5. How confident are you that you could find the money to pay for a **financial emergency** that costs about \$1000?

|               |   |   |                   |   |                 |   |   |                 |    |  |
|---------------|---|---|-------------------|---|-----------------|---|---|-----------------|----|--|
| 1             | 2 | 3 | 4                 | 5 | 6               | 7 | 8 | 9               | 10 |  |
| No Confidence |   |   | Little Confidence |   | Some Confidence |   |   | High Confidence |    |  |

6. How often does this happen to you? You want to eat, go to a movie, or do something else and you **don't go because you can't afford to.**

|              |   |   |           |   |        |   |   |       |    |
|--------------|---|---|-----------|---|--------|---|---|-------|----|
| 1            | 2 | 3 | 4         | 5 | 6      | 7 | 8 | 9     | 10 |
| All the time |   |   | Sometimes |   | Rarely |   |   | Never |    |

7. How frequently do you find yourself just getting by financially and living **paycheck to paycheck?**

|                 |   |   |           |   |        |   |   |       |    |
|-----------------|---|---|-----------|---|--------|---|---|-------|----|
| 1               | 2 | 3 | 4         | 5 | 6      | 7 | 8 | 9     | 10 |
| All of the time |   |   | Sometimes |   | Rarely |   |   | Never |    |

8. How **stressed** do you feel about your personal finances **in general?**

|                     |   |   |             |   |            |   |   |                  |    |
|---------------------|---|---|-------------|---|------------|---|---|------------------|----|
| 1                   | 2 | 3 | 4           | 5 | 6          | 7 | 8 | 9                | 10 |
| Overwhelming Stress |   |   | High Stress |   | Low Stress |   |   | No Stress at All |    |

**For the following questions, imagine you are going to have surgery:**

1. There are 2 similar surgical treatments for a problem that lead to similar results, how much **extra would you be willing to pay out of pocket** for the treatment that allowed you to return to activities (work, school, sports, etc.) earlier:

| Number of days back to activities earlier | Extra out of pocket payment          |
|-------------------------------------------|--------------------------------------|
| 3 days                                    | <input type="checkbox"/> \$0         |
|                                           | <input type="checkbox"/> up to \$250 |
|                                           | <input type="checkbox"/> \$251-500   |
|                                           | <input type="checkbox"/> \$501-1000  |
|                                           | <input type="checkbox"/> \$1001-2500 |
|                                           | <input type="checkbox"/> > \$2500    |
| 7 days                                    | <input type="checkbox"/> \$0         |
|                                           | <input type="checkbox"/> up to \$250 |
|                                           | <input type="checkbox"/> \$251-500   |
|                                           | <input type="checkbox"/> \$501-1000  |
|                                           | <input type="checkbox"/> \$1001-2500 |
|                                           | <input type="checkbox"/> > \$2500    |
| 14 days                                   | <input type="checkbox"/> \$0         |
|                                           | <input type="checkbox"/> up to \$250 |
|                                           | <input type="checkbox"/> \$251-500   |
|                                           | <input type="checkbox"/> \$501-1000  |
|                                           | <input type="checkbox"/> \$1001-2500 |
|                                           | <input type="checkbox"/> > \$2500    |

2. There are 2 similar surgical treatments for a problem that lead to similar results, how much **extra should your insurance company pay** for the treatment that allowed you to return to activities (work, school, sports, etc.) earlier:

| Number of days back to activities earlier | Extra cost to insurance company      |
|-------------------------------------------|--------------------------------------|
| 3 days                                    | <input type="checkbox"/> \$0         |
|                                           | <input type="checkbox"/> up to \$250 |
|                                           | <input type="checkbox"/> \$251-500   |
|                                           | <input type="checkbox"/> \$501-1000  |
|                                           | <input type="checkbox"/> \$1001-2500 |
|                                           | <input type="checkbox"/> > \$2500    |

|         |                                                                                                                                                                                                                                |
|---------|--------------------------------------------------------------------------------------------------------------------------------------------------------------------------------------------------------------------------------|
| 7 days  | <input type="checkbox"/> \$0<br><input type="checkbox"/> up to \$250<br><input type="checkbox"/> \$251-500<br><input type="checkbox"/> \$501-1000<br><input type="checkbox"/> \$1001-2500<br><input type="checkbox"/> > \$2500 |
| 14 days | <input type="checkbox"/> \$0<br><input type="checkbox"/> up to \$250<br><input type="checkbox"/> \$251-500<br><input type="checkbox"/> \$501-1000<br><input type="checkbox"/> \$1001-2500<br><input type="checkbox"/> > \$2500 |

3. There are 2 similar surgical treatments for a problem that lead to similar results, how much extra would you be willing to **pay out of pocket** for the treatment that uses a smaller incision:

| How many centimeters the incision is shorter                                                                                                                                                                                                                                                                                                                                         | Extra out of pocket payment                                                                                                                                                                                                    |
|--------------------------------------------------------------------------------------------------------------------------------------------------------------------------------------------------------------------------------------------------------------------------------------------------------------------------------------------------------------------------------------|--------------------------------------------------------------------------------------------------------------------------------------------------------------------------------------------------------------------------------|
| 1 cm<br><div style="display: flex; justify-content: space-around; width: 100px;"> <div style="text-align: center;"> <br/>0cm</div> <div style="text-align: center;"> <br/>1</div> </div>                                                                                                                                                                                             | <input type="checkbox"/> \$0<br><input type="checkbox"/> up to \$250<br><input type="checkbox"/> \$251-500<br><input type="checkbox"/> \$501-1000<br><input type="checkbox"/> \$1001-2500<br><input type="checkbox"/> > \$2500 |
| 2 cm<br><div style="display: flex; justify-content: space-around; width: 100px;"> <div style="text-align: center;"> <br/>0cm</div> <div style="text-align: center;"> <br/>1</div> <div style="text-align: center;"> <br/>2</div> </div>                                                                                                                                              | <input type="checkbox"/> \$0<br><input type="checkbox"/> up to \$250<br><input type="checkbox"/> \$251-500<br><input type="checkbox"/> \$501-1000<br><input type="checkbox"/> \$1001-2500<br><input type="checkbox"/> > \$2500 |
| 3 cm<br><div style="display: flex; justify-content: space-around; width: 100px;"> <div style="text-align: center;"> <br/>0cm</div> <div style="text-align: center;"> <br/>1</div> <div style="text-align: center;"> <br/>2</div> <div style="text-align: center;"> <br/>3</div> </div>                                                                                               | <input type="checkbox"/> \$0<br><input type="checkbox"/> up to \$250<br><input type="checkbox"/> \$251-500<br><input type="checkbox"/> \$501-1000<br><input type="checkbox"/> \$1001-2500<br><input type="checkbox"/> > \$2500 |
| 4 cm<br><div style="display: flex; justify-content: space-around; width: 100px;"> <div style="text-align: center;"> <br/>0cm</div> <div style="text-align: center;"> <br/>1</div> <div style="text-align: center;"> <br/>2</div> <div style="text-align: center;"> <br/>3</div> <div style="text-align: center;"> <br/>4</div> </div>                                                | <input type="checkbox"/> \$0<br><input type="checkbox"/> up to \$250<br><input type="checkbox"/> \$251-500<br><input type="checkbox"/> \$501-1000<br><input type="checkbox"/> \$1001-2500<br><input type="checkbox"/> > \$2500 |
| 5 cm<br><div style="display: flex; justify-content: space-around; width: 100px;"> <div style="text-align: center;"> <br/>0cm</div> <div style="text-align: center;"> <br/>1</div> <div style="text-align: center;"> <br/>2</div> <div style="text-align: center;"> <br/>3</div> <div style="text-align: center;"> <br/>4</div> <div style="text-align: center;"> <br/>5</div> </div> | <input type="checkbox"/> \$0<br><input type="checkbox"/> up to \$250<br><input type="checkbox"/> \$251-500<br><input type="checkbox"/> \$501-1000<br><input type="checkbox"/> \$1001-2500<br><input type="checkbox"/> > \$2500 |

4. There are 2 similar surgical treatments for a problem that lead to similar results, how much extra should ***your insurance company pay for the treatment that uses a smaller incision:***

| How many centimeters the incision is shorter                                                                                                                     | Extra cost to insurance company                                                                                                                                                                                                |
|------------------------------------------------------------------------------------------------------------------------------------------------------------------|--------------------------------------------------------------------------------------------------------------------------------------------------------------------------------------------------------------------------------|
| 1 cm<br><div style="text-align: center;">                     <br/>             0cm   1           </div>                                                         | <input type="checkbox"/> \$0<br><input type="checkbox"/> up to \$250<br><input type="checkbox"/> \$251-500<br><input type="checkbox"/> \$501-1000<br><input type="checkbox"/> \$1001-2500<br><input type="checkbox"/> > \$2500 |
| 2 cm<br><div style="text-align: center;">                            <br/>             0cm   1      2           </div>                                           | <input type="checkbox"/> \$0<br><input type="checkbox"/> up to \$250<br><input type="checkbox"/> \$251-500<br><input type="checkbox"/> \$501-1000<br><input type="checkbox"/> \$1001-2500<br><input type="checkbox"/> > \$2500 |
| 3 cm<br><div style="text-align: center;">                                   <br/>             0cm   1      2      3           </div>                             | <input type="checkbox"/> \$0<br><input type="checkbox"/> up to \$250<br><input type="checkbox"/> \$251-500<br><input type="checkbox"/> \$501-1000<br><input type="checkbox"/> \$1001-2500<br><input type="checkbox"/> > \$2500 |
| 4 cm<br><div style="text-align: center;">                                          <br/>             0cm   1      2      3      4           </div>               | <input type="checkbox"/> \$0<br><input type="checkbox"/> up to \$250<br><input type="checkbox"/> \$251-500<br><input type="checkbox"/> \$501-1000<br><input type="checkbox"/> \$1001-2500<br><input type="checkbox"/> > \$2500 |
| 5 cm<br><div style="text-align: center;">                                                 <br/>             0cm   1      2      3      4      5           </div> | <input type="checkbox"/> \$0<br><input type="checkbox"/> up to \$250<br><input type="checkbox"/> \$251-500<br><input type="checkbox"/> \$501-1000<br><input type="checkbox"/> \$1001-2500<br><input type="checkbox"/> > \$2500 |

**Supplementary Table 1. Willingness to Pay / Insurer Responsibility vs. Sex**

Willingness to pay vs Sex:

|         | Pay: | Male  |       | Female |       | Chi-squared test |
|---------|------|-------|-------|--------|-------|------------------|
|         |      | Count | %     | Count  | %     | p-value          |
| 3 Days  | No   | 21    | 34.4% | 23     | 41.8% | 0.53             |
|         | Yes  | 40    | 65.6% | 32     | 58.2% |                  |
| 7 Days  | No   | 13    | 21.3% | 19     | 32.8% | 0.23             |
|         | Yes  | 48    | 78.7% | 39     | 67.2% |                  |
| 14 Days | No   | 11    | 17.7% | 22     | 39.3% | 0.016            |
|         | Yes  | 51    | 82.3% | 34     | 60.7% |                  |

Insurer cost responsibility vs Sex

|         | Pay: | Male  |       | Female |       | Chi-squared test |
|---------|------|-------|-------|--------|-------|------------------|
|         |      | Count | %     | Count  | %     | p-value          |
| 3 Days  | No   | 13    | 21.7% | 10     | 17.5% | 0.743            |
|         | Yes  | 47    | 78.3% | 47     | 82.5% |                  |
| 7 Days  | No   | 6     | 10.0% | 8      | 14.0% | 0.699            |
|         | Yes  | 54    | 90.0% | 49     | 86.0% |                  |
| 14 Days | No   | 4     | 6.7%  | 8      | 14.5% | 0.226            |
|         | Yes  | 56    | 93.3% | 47     | 85.5% |                  |

Willingness to pay vs Sex :

|       | Pay: | Male  |       | Female |       | Chi-squared test |
|-------|------|-------|-------|--------|-------|------------------|
|       |      | Count | %     | Count  | %     | p-value          |
| 1 cm. | No   | 32    | 52.5% | 24     | 44.4% | 0.502            |
|       | Yes  | 29    | 47.5% | 30     | 55.6% |                  |
| 2 cm. | No   | 23    | 37.7% | 22     | 42.3% | 0.76             |
|       | Yes  | 38    | 62.3% | 30     | 57.7% |                  |
| 3 cm. | No   | 18    | 29.5% | 18     | 29.5% | 0.653            |
|       | Yes  | 43    | 70.5% | 43     | 70.5% |                  |
| 4 cm. | No   | 18    | 29.5% | 19     | 37.3% | 0.653            |
|       | Yes  | 43    | 70.5% | 32     | 62.7% |                  |

|                                    |      |       |       |        |       |                  |
|------------------------------------|------|-------|-------|--------|-------|------------------|
| 5 cm.                              | No   | 19    | 31.1% | 19     | 37.3% | 0.632            |
|                                    | Yes  | 42    | 68.9% | 32     | 62.7% |                  |
| Insurer cost responsibility vs Sex |      |       |       |        |       |                  |
|                                    |      | Male  |       | Female |       | Chi-squared test |
|                                    | Pay: | Count | %     | Count  | %     | p-value          |
| 1 cm.                              | No   | 22    | 36.7% | 12     | 21.4% | 0.11             |
|                                    | Yes  | 38    | 63.3% | 44     | 78.6% |                  |
| 2 cm.                              | No   | 16    | 26.7% | 9      | 16.4% | 0.266            |
|                                    | Yes  | 44    | 73.3% | 46     | 83.6% |                  |
| 3 cm.                              | No   | 12    | 20.0% | 10     | 18.2% | 0.992            |
|                                    | Yes  | 48    | 80.0% | 45     | 81.8% |                  |
| 4 cm.                              | No   | 12    | 20.0% | 13     | 23.6% | 0.806            |
|                                    | Yes  | 48    | 80.0% | 42     | 76.4% |                  |
| 5 cm.                              | No   | 13    | 21.7% | 13     | 23.6% | 0.997            |
|                                    | Yes  | 47    | 78.3% | 42     | 76.4% |                  |

**Supplementary Table 2. Willingness to Pay / Insurer Responsibility vs. Financial Security**

| Willingness to Pay vs. Financial Security          |      |     |        |     |     |      | Mann-Whitney U-Test |
|----------------------------------------------------|------|-----|--------|-----|-----|------|---------------------|
|                                                    | Pay: | N   | Median | IQR | Min | Max  | p-value             |
| 3 Days                                             | No   | 44  | 7.1    | 4.4 | 2.4 | 10.0 | 0.323               |
|                                                    | Yes  | 73  | 7.4    | 3.6 | 2.1 | 10.0 |                     |
| 7 Days                                             | No   | 32  | 6.0    | 5.3 | 2.4 | 10.0 | 0.075               |
|                                                    | Yes  | 88  | 7.5    | 3.3 | 2.1 | 10.0 |                     |
| 14 Days                                            | No   | 33  | 6.8    | 5.0 | 2.3 | 10.0 | 0.467               |
|                                                    | Yes  | 86  | 7.3    | 3.4 | 2.1 | 10.0 |                     |
| Insurer Cost Responsibility vs. Financial Security |      |     |        |     |     |      | Mann-Whitney U-Test |
|                                                    | Pay: | N   | Median | IQR | Min | Max  | p-value             |
| 3 Days                                             | No   | 23  | 7.9    | 4.4 | 2.6 | 10.0 | 0.951               |
|                                                    | Yes  | 95  | 7.1    | 3.7 | 2.1 | 10.0 |                     |
| 7 Days                                             | No   | 14  | 7.0    | 4.9 | 2.6 | 10.0 | 0.571               |
|                                                    | Yes  | 104 | 7.2    | 3.5 | 2.1 | 10.0 |                     |
| 14 Days                                            | No   | 12  | 7.1    | 5.2 | 2.6 | 10.0 | 0.727               |
|                                                    | Yes  | 104 | 7.2    | 3.6 | 2.1 | 10.0 |                     |
| Willingness to Pay vs. Financial Security          |      |     |        |     |     |      | Mann-Whitney U-Test |
|                                                    | Pay: | N   | Median | IQR | Min | Max  | p-value             |
| 1 cm.                                              | No   | 56  | 7.0    | 3.9 | 2.1 | 10.0 | 0.569               |
|                                                    | Yes  | 60  | 7.8    | 3.6 | 2.4 | 10.0 |                     |
| 2 cm.                                              | No   | 45  | 7.0    | 4.3 | 2.1 | 10.0 | 0.476               |
|                                                    | Yes  | 69  | 7.5    | 3.4 | 2.4 | 10.0 |                     |
| 3 cm.                                              | No   | 36  | 6.4    | 4.5 | 2.6 | 10.0 | 0.502               |
|                                                    | Yes  | 77  | 7.5    | 3.4 | 2.1 | 10.0 |                     |
| 4 cm.                                              | No   | 37  | 7.0    | 4.4 | 2.6 | 10.0 | 0.823               |
|                                                    | Yes  | 76  | 7.4    | 3.3 | 2.1 | 10.0 |                     |
| 5 cm.                                              | No   | 38  | 6.8    | 4.4 | 2.6 | 10.0 | 0.773               |
|                                                    | Yes  | 75  | 7.5    | 3.4 | 2.1 | 10.0 |                     |
| Insurer Cost Responsibility vs. Financial Security |      |     |        |     |     |      | Mann-Whitney U-Test |
|                                                    | Pay: | N   | Median | IQR | Min | Max  | p-value             |
| 1 cm.                                              | No   | 34  | 8.3    | 3.8 | 3.6 | 10.0 | 0.263               |
|                                                    | Yes  | 83  | 7.1    | 3.6 | 2.1 | 10.0 |                     |

|       |     |    |     |     |     |      |       |
|-------|-----|----|-----|-----|-----|------|-------|
| 2 cm. | No  | 25 | 8.4 | 4.1 | 3.6 | 10.0 | 0.422 |
|       | Yes | 91 | 7.1 | 3.6 | 2.1 | 10.0 |       |
| 3 cm. | No  | 22 | 6.0 | 4.4 | 3.6 | 10.0 | 0.964 |
|       | Yes | 94 | 7.2 | 3.4 | 2.1 | 10.0 |       |
| 4 cm. | No  | 25 | 5.8 | 4.4 | 3.6 | 10.0 | 0.799 |
|       | Yes | 91 | 7.3 | 3.4 | 2.1 | 10.0 |       |
| 5 cm. | No  | 26 | 6.0 | 4.3 | 3.6 | 10.0 | 0.879 |
|       | Yes | 90 | 7.2 | 3.4 | 2.1 | 10.0 |       |

**Supplementary Table 3. Willingness to Pay / Insurer Responsibility vs. Education**

## Mann-Whitney U-Test

## Willingness to Pay vs. Education

|         | Pay: | N  | Median | IQR | Min  | Max  | p-value |
|---------|------|----|--------|-----|------|------|---------|
| 3 Days  | No   | 41 | 16.0   | 4.0 | 10.0 | 24.0 | 0.969   |
|         | Yes  | 65 | 16.0   | 5.0 | 12.0 | 25.0 |         |
| 7 Days  | No   | 29 | 16.0   | 4.0 | 10.0 | 24.0 | 0.351   |
|         | Yes  | 78 | 16.0   | 4.8 | 12.0 | 25.0 |         |
| 14 Days | No   | 30 | 16.0   | 1.8 | 10.0 | 24.0 | 0.151   |
|         | Yes  | 76 | 16.0   | 5.0 | 12.0 | 25.0 |         |

Mann-Whitney U-Test

## Insurer Cost Responsibility vs. Education

|         | Pay: | N  | Median | IQR | Min  | Max  | p-value |
|---------|------|----|--------|-----|------|------|---------|
| 3 Days  | No   | 21 | 16.0   | 6.0 | 10.0 | 24.0 | 0.198   |
|         | Yes  | 85 | 16.0   | 5.0 | 12.0 | 25.0 |         |
| 7 Days  | No   | 12 | 15.5   | 5.5 | 10.0 | 24.0 | 0.247   |
|         | Yes  | 93 | 16.0   | 3.0 | 12.0 | 25.0 |         |
| 14 Days | No   | 10 | 16.0   | 4.0 | 10.0 | 24.0 | 0.405   |
|         | Yes  | 94 | 16.0   | 4.8 | 12.0 | 26.0 |         |

Mann-Whitney U-Test

## Willingness to Pay vs. Education

|      | Pay: | N  | Median | IQR | Min  | Max  | p-value |
|------|------|----|--------|-----|------|------|---------|
| 1 cm | No   | 50 | 16.0   | 3.8 | 10.0 | 24.0 | 0.716   |
|      | Yes  | 53 | 16.0   | 5.0 | 12.0 | 25.0 |         |
| 2 cm | No   | 39 | 16.0   | 5.0 | 10.0 | 24.0 | 0.043   |
|      | Yes  | 63 | 16.0   | 4.5 | 12.0 | 25.0 |         |
| 3 cm | No   | 31 | 16.0   | 5.5 | 10.0 | 24.0 | 0.020   |
|      | Yes  | 70 | 16.0   | 4.0 | 12.0 | 25.0 |         |
| 4 cm | No   | 32 | 16.0   | 4.3 | 10.0 | 24.0 | 0.006   |
|      | Yes  | 69 | 17.0   | 4.0 | 12.0 | 25.0 |         |
| 5 cm | No   | 33 | 16.0   | 5.0 | 10.0 | 24.0 | 0.014   |
|      | Yes  | 68 | 16.5   | 4.0 | 12.0 | 25.0 |         |

Mann-Whitney U-

## Insurer Cost Responsibility vs. Education

|      | Test |    |        |     |      |      |         |
|------|------|----|--------|-----|------|------|---------|
|      | Pay: | N  | Median | IQR | Min  | Max  | p-value |
| 1 cm | No   | 28 | 16.0   | 4.0 | 12.0 | 24.0 | 0.511   |
|      | Yes  | 75 | 16.0   | 4.0 | 10.0 | 25.0 |         |
| 2 cm | No   | 19 | 16.0   | 3.5 | 12.0 | 24.0 | 0.293   |
|      | Yes  | 84 | 16.0   | 5.0 | 10.0 | 25.0 |         |
| 3 cm | No   | 17 | 16.0   | 5.0 | 12.0 | 24.0 | 0.242   |
|      | Yes  | 86 | 16.0   | 5.0 | 10.0 | 25.0 |         |
| 4 cm | No   | 20 | 16.0   | 5.3 | 12.0 | 24.0 | 0.221   |
|      | Yes  | 83 | 16.0   | 5.0 | 10.0 | 25.0 |         |
| 5 cm | No   | 21 | 16.0   | 5.0 | 12.0 | 24.0 | 0.218   |
|      | Yes  | 82 | 16.0   | 5.0 | 10.0 | 25.0 |         |

**Supplementary Table 4. Willingness to Pay / Insurer Responsibility vs. Work Status**

**Willingness to Pay vs. Work Status**

|         | Pay: | Not Working |       | Working |       | Chi-square |
|---------|------|-------------|-------|---------|-------|------------|
|         |      | Count       | %     | Count   | %     | p-value    |
| 3 Days  | No   | 19          | 45.2% | 25      | 33.3% | 0.282      |
|         | Yes  | 23          | 54.8% | 50      | 66.7% |            |
| 7 Days  | No   | 16          | 38.1% | 16      | 20.5% | 0.063      |
|         | Yes  | 26          | 61.9% | 62      | 79.5% |            |
| 14 Days | No   | 17          | 40.5% | 16      | 20.8% | 0.038      |
|         | Yes  | 25          | 59.5% | 61      | 79.2% |            |

**Insurer Cost Responsibility vs. Work Status**

|         | Pay: | Not Working |       | Working |       | Chi-square |
|---------|------|-------------|-------|---------|-------|------------|
|         |      | Count       | %     | Count   | %     | p-value    |
| 3 Days  | No   | 12          | 29.3% | 11      | 14.3% | 0.087      |
|         | Yes  | 29          | 70.7% | 66      | 85.7% |            |
| 7 Days  | No   | 10          | 24.4% | 4       | 5.2%  | 0.005      |
|         | Yes  | 31          | 75.6% | 73      | 94.8% |            |
| 14 Days | No   | 8           | 20.0% | 4       | 5.3%  | 0.031      |
|         | Yes  | 32          | 80.0% | 72      | 94.7% |            |

**Willingness to Pay vs. Work Status**

|       | Pay: | Not Working |       | Working |       | Chi-square |
|-------|------|-------------|-------|---------|-------|------------|
|       |      | Count       | %     | Count   | %     | p-value    |
| 1 cm. | No   | 21          | 50.0% | 35      | 47.3% | 0.931      |
|       | Yes  | 21          | 50.0% | 39      | 52.7% |            |
| 2 cm. | No   | 19          | 46.3% | 26      | 35.6% | 0.355      |
|       | Yes  | 22          | 53.7% | 47      | 64.4% |            |
| 3 cm. | No   | 18          | 43.9% | 18      | 25.0% | 0.062      |
|       | Yes  | 23          | 56.1% | 54      | 75.0% |            |
| 4 cm. | No   | 18          | 43.9% | 19      | 26.4% | 0.089      |
|       | Yes  | 23          | 56.1% | 53      | 73.6% |            |
| 5 cm. | No   | 18          | 43.9% | 20      | 27.8% | 0.124      |
|       | Yes  | 23          | 56.1% | 52      | 72.2% |            |

**Insurer Cost Responsibility vs. Work Status**

|       | Pay: | Not Working |       | Working |       | Chi-square |
|-------|------|-------------|-------|---------|-------|------------|
|       |      | Count       | %     | Count   | %     | p-value    |
| 1 cm. | No   | 14          | 33.3% | 20      | 26.7% | 0.583      |
|       | Yes  | 28          | 66.7% | 55      | 73.3% |            |
| 2 cm. | No   | 12          | 29.3% | 13      | 17.3% | 0.208      |
|       | Yes  | 29          | 70.7% | 62      | 82.7% |            |
| 3 cm. | No   | 11          | 26.8% | 11      | 14.7% | 0.177      |
|       | Yes  | 30          | 73.2% | 64      | 85.3% |            |
| 4 cm. | No   | 11          | 26.8% | 14      | 18.7% | 0.432      |
|       | Yes  | 30          | 73.2% | 61      | 81.3% |            |
| 5 cm. | No   | 11          | 26.8% | 15      | 20.0% | 0.542      |
|       | Yes  | 30          | 73.2% | 60      | 80.0% |            |

**Supplementary Table 5. Willingness to Pay / Insurer Responsibility vs. Race**

**Willingness to Pay vs Race**

|         | Pay: | Non-White |       | White |       | Chi-square |
|---------|------|-----------|-------|-------|-------|------------|
|         |      | Count     | %     | Count | %     | p-value    |
| 3 Days  | No   | 13        | 31.0% | 31    | 41.3% | 0.361      |
|         | Yes  | 29        | 69.0% | 44    | 58.7% |            |
| 7 Days  | No   | 8         | 19.0% | 24    | 30.8% | 0.243      |
|         | Yes  | 34        | 81.0% | 54    | 69.2% |            |
| 14 Days | No   | 9         | 21.4% | 24    | 31.2% | 0.358      |
|         | Yes  | 33        | 78.6% | 53    | 68.8% |            |

**Insurer Cost Responsibility vs Race**

|         | Pay: | Non-White |       | White |       | Chi-square |
|---------|------|-----------|-------|-------|-------|------------|
|         |      | Count     | %     | Count | %     | p-value    |
| 3 Days  | No   | 4         | 9.8%  | 19    | 24.7% | 0.056      |
|         | Yes  | 37        | 90.2% | 58    | 75.3% |            |
| 7 Days  | No   | 3         | 7.3%  | 11    | 14.3% | 0.374      |
|         | Yes  | 38        | 92.7% | 66    | 85.7% |            |
| 14 Days | No   | 2         | 5.0%  | 10    | 13.2% | 0.209      |
|         | Yes  | 39        | 97.5% | 65    | 85.5% |            |

**Willingness to Pay vs Race**

|       | Pay: | Non-White |       | White |       | Chi-square |
|-------|------|-----------|-------|-------|-------|------------|
|       |      | Count     | %     | Count | %     | p-value    |
| 1 cm. | No   | 13        | 31.0% | 43    | 58.1% | 0.014      |
|       | Yes  | 28        | 66.7% | 32    | 43.2% |            |
| 2 cm. | No   | 12        | 29.3% | 33    | 45.2% | 0.141      |
|       | Yes  | 29        | 70.7% | 40    | 54.8% |            |
| 3 cm. | No   | 9         | 22.0% | 27    | 37.5% | 0.171      |
|       | Yes  | 31        | 75.6% | 46    | 63.9% |            |
| 4 cm. | No   | 12        | 29.3% | 25    | 34.7% | 0.802      |
|       | Yes  | 28        | 68.3% | 48    | 66.7% |            |
| 5 cm. | No   | 13        | 31.7% | 25    | 34.7% | > 0.999    |
|       | Yes  | 27        | 65.9% | 48    | 66.7% |            |

**Insurer Cost Responsibility vs Race**

|       | Pay:      | Non-White |                | White    |                | Chi-square |
|-------|-----------|-----------|----------------|----------|----------------|------------|
|       |           | Count     | %              | Count    | %              | p-value    |
| 1 cm. | No<br>Yes | 9<br>31   | 21.4%<br>73.8% | 25<br>52 | 33.3%<br>69.3% | 0.362      |
| 2 cm. | No<br>Yes | 3<br>37   | 7.3%<br>90.2%  | 22<br>54 | 29.3%<br>72.0% | 0.008      |
| 3 cm. | No<br>Yes | 3<br>37   | 7.3%<br>90.2%  | 19<br>57 | 25.3%<br>76.0% | 0.025      |
| 4 cm. | No<br>Yes | 4<br>36   | 9.8%<br>87.8%  | 21<br>55 | 28.0%<br>73.3% | 0.033      |
| 5 cm. | No<br>Yes | 5<br>35   | 12.2%<br>85.4% | 21<br>55 | 28.0%<br>73.3% | 0.105      |
